# Supplementary material for: Benzylperoxy radical cation: an exceptionally stable and bound species
Source: Royal Society of Chemistry journal article supplement (doi:10.1039/d4cp03905j), 2025-01-01
Supplement: d4cp03905j1.pdf [file d4cp03905j1.pdf]

## Supplementary Information

# Benzylperoxy radical cation: an exceptionally stable and bound species

Chow-Shing Lam, Xi-Guang Wei, Yi Pan and Kai-Chung Lau\*

*Department of Chemistry, City University of Hong Kong, Hong Kong SAR. E-mail: kaichung@cityu.edu.hk*

### Computational method

Geometry optimizations of local minima and transition state (TS) structures were carried out using density functional theory (DFT) with the M06 and B3LYP functional, with 6-311++G(2df,p) basis sets. The TSs were confirmed by attaining one imaginary mode in the vibrational frequency calculations at the same level. The intrinsic reaction coordinate (IRC) calculations were performed at a similar level of theory to confirm the connectivity between intermediate (INT) and TS structures in the reaction. To facilitate IBO transformation, the optimization of TS structure and IRC calculations are repeated with the B3LYP/aug-cc-pVTZ basis sets.<sup>1-3</sup> The single-point energy calculations were performed with the explicitly correlated coupled cluster method with single, double, and perturbative triple excitations at the CCSD(T)-F12(b)/cc-pVQZ-F12 level,<sup>4,7</sup> and all energies were corrected with the zero-point vibrational energy (ZPVE) corrections at the B3LYP/6-311++G(2df,p) level. For stable structures core-valence correlation (CV) at the CCSD(T)/cc-pwCVTZ level was also included.<sup>8</sup> In the IBO analysis, the orbital change for an orbital  $i$ , is defined as

$$\Delta_i(s) = \sqrt{\sum_{A=1}^{atoms} (n_{A,i}(s) - n_{A,i}(0))^2}$$

where  $A$  sums over the atoms involved in  $i$  and  $n_{A,i}(s)$  measures the number of electrons on atom  $A$  at IRC arc lengths. Effectively,  $\Delta_i(s)$  quantifies the deviation of charge on the involved atoms with respect to the initial charge distribution at  $s = 0$ .

All the DFT (default grid size) geometry optimizations and vibrational frequency calculations, and NBO analysis were done using the Gaussian 16 package of programs and affiliated NBO 7.0 program. The CCSD(T) and CCSD(T)-F12 calculation were performed using the MOLPRO 2022 program suite.<sup>9</sup> The IBO analysis were done with the IboView program obtained at <http://www.iboview.org/>.

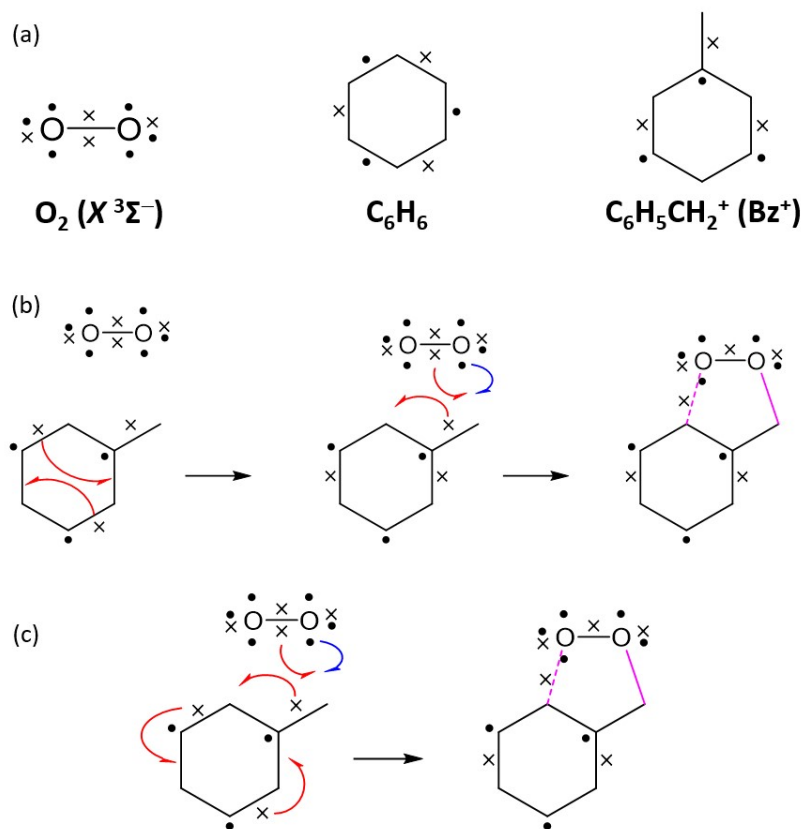

**Figure S1.** The Linnett structure of a)  $\text{O}_2(^3\Sigma^-)$ ,  $\text{C}_6\text{H}_6$  and  $\text{C}_6\text{H}_5\text{CH}_2^+(\text{Bz}^+)$  according to the Linnett double-quartet theory. b) The speculated mechanism of  $\text{O}_2$  addition to  $\text{Bz}^+$ , the curly arrows in Linnett structures (cross and dot represents  $\alpha$  and  $\beta$  electrons, respectively) are drawn in accordance with the electron flow revealed by IBO analysis. c) The alternative single-step mechanism of  $\text{O}_2$  addition to  $\text{Bz}^+$ , this version is to conceal the long-distant flow of aromatic electrons. This compact yet intuitive mechanism cannot be derived by starting from conventional valence bond picture; the charge and spin densities cannot never be rationalized despite forcible attempts.

**Table S1.** The natural bond orbital analysis on the orbital interactions in the  $C_2H_5OO^+$  and  $C_6H_5CH_2OO^+$  cations (triplet state) at the B3LYP/6-311++G(2df,p) level.<sup>a</sup>

|                                                                          | Interactions                                                         | $E(2)^b$ | $\Delta E^c$ | $F^d$ | $r(C_\alpha-O)$ in cation<br>– $r(C_\alpha-O)$ in neutral <sup>e</sup> |
|--------------------------------------------------------------------------|----------------------------------------------------------------------|----------|--------------|-------|------------------------------------------------------------------------|
| <b><math>C_2H_5OO^+</math></b> <sup>f</sup>                              | $\sigma(C_\beta-H) \rightarrow \sigma^*(C_\alpha-O)$                 | 17.7     | 200.8        | 60.3  | 0.72                                                                   |
|                                                                          | $\sigma(C_\beta-H') \rightarrow \sigma^*(C_\alpha-O)$                | 1.1      | 213.4        | 15.1  |                                                                        |
| <b><math>BzOO^+</math></b>                                               | $\alpha: \pi(C_\delta-C_\epsilon) \rightarrow \sigma^*(C_\gamma-O')$ | 41.4     | 81.6         | 57.7  | 0.018                                                                  |
|                                                                          | $\alpha: \pi(C_\beta-C_\gamma) \rightarrow \sigma^*(C_\gamma-O')$    | 32.8     | 87.9         | 54.0  |                                                                        |
|                                                                          | $\alpha: \pi(C_\beta-C_\gamma) \rightarrow \sigma^*(C_\alpha-O)$     | 3.9      | 282.4        | 33.3  |                                                                        |
|                                                                          | $\beta: \pi(C_\delta-C_\epsilon) \rightarrow \sigma^*(C_\gamma-O')$  | 19.5     | 106.7        | 45.2  |                                                                        |
|                                                                          | $\beta: \pi(C_\beta-C_\gamma) \rightarrow \sigma^*(C_\gamma-O')$     | 12.9     | 113.0        | 38.3  |                                                                        |
|                                                                          | $\beta: \pi(C_\beta-C_\gamma) \rightarrow \sigma^*(C_\alpha-O)$      | 3.1      | 282.4        | 30.1  |                                                                        |
| <b>TS [<math>BzOO^+(X^3A) \rightarrow Bz^+ + O_2(^3\Sigma^-)</math>]</b> | $\alpha: \pi(C_\delta-C_\epsilon) \rightarrow \sigma^*(C_\gamma-O')$ | 37.7     | 87.9         | 58.4  | ---                                                                    |
|                                                                          | $\alpha: \pi(C_\beta-C_\gamma) \rightarrow \sigma^*(C_\gamma-O')$    | 30.7     | 100.4        | 54.6  |                                                                        |
|                                                                          | $\alpha: \pi(C_\beta-C_\gamma) \rightarrow \sigma^*(C_\alpha-O)$     | 5.0      | 251.0        | 35.1  |                                                                        |
|                                                                          | $\beta: \pi(C_\delta-C_\epsilon) \rightarrow \sigma^*(C_\gamma-O')$  | 15.6     | 75.3         | 33.9  |                                                                        |
|                                                                          | $\beta: \pi(C_\beta-C_\gamma) \rightarrow \sigma^*(C_\gamma-O')$     | 34.1     | 87.9         | 54.6  |                                                                        |
|                                                                          | $\beta: \pi(C_\beta-C_\gamma) \rightarrow \sigma^*(C_\alpha-O)$      | 7.0      | 244.7        | 41.4  |                                                                        |

<sup>a</sup> The unit of  $E(2)$ ,  $\Delta E$  and  $F$  is in kcal/mol. H and H' are the on-the-plane and out-of-plane alkyl hydrogen atoms, respectively. O and O' are the alkyl (or benzyl) oxygen and the terminal oxygen, respectively.

<sup>b</sup> The stabilization energy,  $E(2)$ , is defined as  $F^2/\Delta E$ .

<sup>c</sup> The orbital energy difference,  $\Delta E$ , is the energy between acceptor and donor orbitals.

<sup>d</sup>  $F$  is the off-diagonal NBO Fock matrix element.

<sup>e</sup> The change of optimized  $C_\alpha-O$  bond length (in Å) from ROO (triplet) to ROO<sup>+</sup>, where R =  $C_2H_5$  (ref. 38) and Bz (this work, B3LYP value, Figure 1).

<sup>f</sup> The interactions found in the  $\alpha$  and  $\beta$  electron spins are very similar, only the values of  $\alpha$  spin are given.

**Table S2.** Cartesian coordinates for the optimized geometries at B3LYP/6-311++G(2df,p) level.

BzOO ( $X^2A''$ )

|   |             |             |             |
|---|-------------|-------------|-------------|
| O | 1.16881800  | 3.33281100  | 0.00000000  |
| O | 1.07797400  | 2.02345800  | 0.00000000  |
| C | -0.32842200 | 1.58079000  | 0.00000000  |
| C | -0.35166900 | 0.08578900  | 0.00000000  |
| C | -0.35171800 | -0.62134500 | 1.20258200  |
| C | -0.35171800 | -0.62134500 | -1.20258200 |
| C | -0.35171800 | -2.01047000 | 1.20399300  |
| C | -0.35171800 | -2.01047000 | -1.20399300 |
| H | -0.35191200 | -0.07987900 | 2.14199200  |
| H | -0.35191200 | -0.07987900 | -2.14199200 |
| H | -0.35396400 | -2.54964400 | 2.14350000  |
| H | -0.35396400 | -2.54964400 | -2.14350000 |
| H | -0.78669200 | 2.01040100  | 0.89087900  |
| H | -0.78669200 | 2.01040100  | -0.89087900 |
| C | -0.35211900 | -2.70660200 | 0.00000000  |
| H | -0.35471800 | -3.78997600 | 0.00000000  |

BzOO<sup>+</sup> ( $X^3A$ )

|   |             |             |             |
|---|-------------|-------------|-------------|
| C | -1.45895100 | -1.31980000 | 0.26972900  |
| C | -0.17262100 | -0.84620100 | 0.62272900  |
| C | 0.19520000  | 0.50661900  | 0.38218900  |
| C | -0.74539000 | 1.38528900  | -0.08796100 |
| C | -2.05195000 | 0.92194000  | -0.36741100 |
| C | -2.39699100 | -0.43235000 | -0.20181100 |
| H | -1.70523200 | -2.36146000 | 0.42933900  |
| H | 0.47966900  | -1.49111100 | 1.19890900  |
| H | -0.49282900 | 2.41853900  | -0.29131100 |
| H | -2.78444000 | 1.61631000  | -0.76127100 |
| H | -3.40075100 | -0.76247000 | -0.43591100 |
| C | 1.63566000  | 0.87421800  | 0.54150900  |
| H | 2.03086000  | 0.71317800  | 1.54723900  |
| H | 1.88323000  | 1.87756800  | 0.20180900  |
| O | 2.44559000  | -0.01705200 | -0.34330100 |
| O | 1.79937900  | -1.05155200 | -0.76203100 |

BzOO<sup>+</sup> ( $a^1A$ )

|   |             |             |             |
|---|-------------|-------------|-------------|
| C | 0.29675600  | 1.04606400  | 0.37381200  |
| C | 1.60266300  | 1.39513700  | 0.11383700  |
| C | 2.52481500  | 0.39952800  | -0.23228900 |
| C | 2.14419200  | -0.95200100 | -0.30059500 |
| C | 0.84264700  | -1.31063600 | -0.03378100 |
| H | -0.43724100 | 1.81105200  | 0.60283100  |
| H | 1.91041200  | 2.43157500  | 0.15266900  |
| H | 3.54364900  | 0.67730400  | -0.47436000 |
| H | 2.87596600  | -1.70576900 | -0.56029800 |
| H | 0.53738300  | -2.34877100 | -0.07801400 |
| C | -0.08135600 | -0.31825100 | 0.35727100  |
| C | -1.46935500 | -0.69145000 | 0.74496200  |
| H | -1.64899300 | -1.76294700 | 0.80941700  |
| H | -1.94019300 | -0.12849200 | 1.54675900  |
| O | -2.13880100 | -0.27724900 | -0.53746600 |
| O | -2.86159300 | 0.72921100  | -0.47982200 |

TS: BzOO<sup>+</sup> ( $X^3A$ ) → Bz<sup>+</sup> + O<sub>2</sub> ( $X^3\Sigma^-$ )

|   |             |             |             |
|---|-------------|-------------|-------------|
| C | -1.52954600 | -1.30781400 | 0.25146700  |
| C | -0.22613900 | -0.88974300 | 0.62912100  |
| C | 0.17012800  | 0.43289300  | 0.43483100  |
| C | -0.74222900 | 1.33752200  | -0.08444800 |
| C | -2.07226700 | 0.92961300  | -0.40058800 |
| C | -2.45095600 | -0.38885000 | -0.25012600 |
| H | -1.81084200 | -2.34476600 | 0.38779600  |
| H | 0.42007900  | -1.59421800 | 1.13719100  |
| H | -0.45083600 | 2.36442500  | -0.27264900 |
| H | -2.76572700 | 1.66155900  | -0.79518800 |
| H | -3.44831100 | -0.70983000 | -0.52007200 |
| C | 1.58486100  | 0.80639800  | 0.66730400  |
| H | 2.01418500  | 0.43626700  | 1.59768400  |
| H | 1.82332800  | 1.85533200  | 0.51713300  |
| O | 2.45255400  | 0.11837000  | -0.41116400 |
| O | 2.02432200  | -1.01698000 | -0.78099300 |

**Table S3.** Cartesian coordinates for the optimized geometries at CCSD(T)/6-311+G(d) level.BzOO ( $X^2A''$ )

|   |             |            |            |
|---|-------------|------------|------------|
| C | -0.13514219 | 2.04387661 | 1.21661922 |
|---|-------------|------------|------------|

|   |             |             |             |
|---|-------------|-------------|-------------|
| C | -0.13514219 | 2.04387661  | -1.21661922 |
| C | 0.20474257  | 0.68194637  | 1.21532375  |
| C | 0.20474257  | 0.68194637  | -1.21532375 |
| C | 0.37808926  | -0.00636934 | 0.00000000  |
| C | -0.30543154 | 2.72585564  | 0.00000000  |
| H | -0.26511855 | 2.57109053  | 2.16245296  |
| H | -0.26511855 | 2.57109053  | -2.16245296 |
| H | 0.33465439  | 0.15126660  | 2.16087972  |
| H | 0.33465439  | 0.15126660  | -2.16087972 |
| H | -0.56738912 | 3.78464814  | 0.00000000  |
| C | 0.70082488  | -1.47412003 | 0.00000000  |
| H | 1.24699120  | -1.78789037 | 0.89769068  |
| H | 1.24699120  | -1.78789037 | -0.89769068 |
| O | -0.57719370 | -2.20103682 | 0.00000000  |
| O | -0.36868631 | -3.50722074 | 0.00000000  |

BzOO<sup>+</sup> ( $X^3A$ )

|   |             |             |             |
|---|-------------|-------------|-------------|
| C | -1.15720151 | -1.43022418 | 0.03957603  |
| C | 0.12188820  | -0.97138757 | 0.50037685  |
| C | 0.49837656  | 0.41168171  | 0.34935212  |
| C | -0.41796285 | 1.32771746  | -0.12997279 |
| C | -1.72402466 | 0.87704718  | -0.49171595 |
| C | -2.07488861 | -0.50136828 | -0.43005366 |
| H | -1.41435553 | -2.48465345 | 0.13142548  |
| H | 0.69560610  | -1.61490758 | 1.17063346  |
| H | -0.14687610 | 2.37296702  | -0.28064045 |
| H | -2.44578558 | 1.59694366  | -0.87891278 |
| H | -3.07266551 | -0.81588139 | -0.73359164 |
| C | 1.96783112  | 0.67258121  | 0.47647373  |
| H | 2.39378828  | 0.40953971  | 1.45307842  |
| H | 2.28814825  | 1.67067766  | 0.16632995  |
| O | 2.62336212  | -0.25405590 | -0.51196729 |
| O | 1.86475975  | -1.26667725 | -0.83039147 |

BzOO<sup>+</sup> ( $a^1A$ )

|   |             |             |             |
|---|-------------|-------------|-------------|
| C | 0.26558245  | 1.04668350  | 0.34493598  |
| C | 1.58725963  | 1.40806269  | 0.11408399  |
| C | 2.52680431  | 0.40638492  | -0.23122847 |
| C | 2.15781617  | -0.96482595 | -0.29167183 |
| C | 0.84204891  | -1.33692516 | -0.04723040 |
| H | -0.49142846 | 1.81031490  | 0.54313370  |
| H | 1.88551490  | 2.45525161  | 0.13427396  |
| H | 3.55259440  | 0.69312369  | -0.46674229 |
| H | 2.90227321  | -1.71609699 | -0.55262054 |
| H | 0.54141764  | -2.38460159 | -0.08589620 |
| C | -0.09192693 | -0.33862466 | 0.36352537  |
| C | -1.48991608 | -0.71122865 | 0.75327021  |
| H | -1.67166225 | -1.78887279 | 0.80176529  |
| H | -1.94807041 | -0.15436287 | 1.57486189  |
| O | -2.09750657 | -0.25535637 | -0.51802286 |
| O | -2.77005093 | 0.82491774  | -0.43196481 |

TS: BzOO<sup>+</sup> ( $X^3A$ ) → Bz<sup>+</sup> + O<sub>2</sub> ( $X^3\Sigma^-$ )

|   |             |             |             |
|---|-------------|-------------|-------------|
| C | 0.20039500  | 0.53133200  | 0.52584300  |
| C | 1.61146100  | 0.90720900  | 0.64872800  |
| C | -0.12248100 | -0.82521900 | 0.73510900  |
| C | -0.72755800 | 1.37766100  | -0.09629400 |

|   |             |             |             |
|---|-------------|-------------|-------------|
| C | -2.04566300 | 0.90522600  | -0.42602500 |
| C | -1.39843700 | -1.31011000 | 0.32900000  |
| C | -2.35458400 | -0.43563800 | -0.26019900 |
| O | 2.33442700  | -0.00309600 | -0.54700500 |
| O | 1.74488100  | -1.08479900 | -0.78564000 |
| H | 2.16259400  | 0.53359600  | 1.51552500  |
| H | 1.90101900  | 1.91584600  | 0.34981500  |
| H | -0.45523500 | 2.40648500  | -0.34040900 |
| H | -2.76305100 | 1.59426700  | -0.87008700 |
| H | -3.32807500 | -0.82225200 | -0.55818800 |
| H | -1.64709600 | -2.36011700 | 0.48538000  |
| H | 0.51658200  | -1.46743600 | 1.34214500  |

**Table S4.** The IRC and IBO results corresponding to Figure 5. All energy is relative to fully optimized energy of BzOO<sup>+</sup> at B3LYP/aug-cc-pVTZ level. IBO changes are measured and plotted as the root-mean-square deviation for the orbital partial charge distribution among the atoms with respect to the initial partial charge distribution. Structures [I-V] and [TS] with IBOs presented in Figure 4 are in boldface.

| Step number <sup>a</sup> | IRC / bohr<br>amu <sup>1/2</sup> | relative<br>energy /<br>kJ mol <sup>-1</sup> | orbital change / e <sup>-1</sup> |                |               |               |               |               |
|--------------------------|----------------------------------|----------------------------------------------|----------------------------------|----------------|---------------|---------------|---------------|---------------|
|                          |                                  |                                              | IBO-1 $\alpha$                   | IBO-2 $\alpha$ | IBO-1 $\beta$ | IBO-2 $\beta$ | IBO-3 $\beta$ | IBO-4 $\beta$ |
| -50                      | -15.0                            | -102                                         |                                  |                |               |               |               |               |
| -49                      | -14.7                            | -102                                         |                                  |                |               |               |               |               |
| -48                      | -14.4                            | -102                                         |                                  |                |               |               |               |               |
| -47                      | -14.1                            | -102                                         |                                  |                |               |               |               |               |
| -46                      | -13.8                            | -102                                         |                                  |                |               |               |               |               |
| -45                      | -13.6                            | -102                                         |                                  |                |               |               |               |               |
| -44                      | -13.3                            | -102                                         |                                  |                |               |               |               |               |
| -43                      | -13.0                            | -102                                         |                                  |                |               |               |               |               |
| -42                      | -12.7                            | -102                                         |                                  |                |               |               |               |               |
| -41                      | -12.5                            | -102                                         |                                  |                |               |               |               |               |
| -40                      | -12.2                            | -102                                         | 0.00                             | 0.00           | 0.00          | 0.00          | 0.00          | 0.00          |
| -39                      | -11.9                            | -102                                         |                                  |                |               |               |               |               |
| -38                      | -11.6                            | -102                                         |                                  |                |               |               |               |               |
| -37                      | -11.3                            | -102                                         |                                  |                |               |               |               |               |
| -36                      | -11.0                            | -102                                         |                                  |                |               |               |               |               |
| -35                      | -10.7                            | -101                                         |                                  |                |               |               |               |               |
| -34                      | -10.4                            | -101                                         |                                  |                |               |               |               |               |
| -33                      | -10.1                            | -101                                         |                                  |                |               |               |               |               |
| -32                      | -9.83                            | -101                                         |                                  |                |               |               |               |               |
| -31                      | -9.53                            | -100                                         |                                  |                |               |               |               |               |
| -30                      | -9.24                            | -99.9                                        |                                  |                |               |               |               |               |
| -29                      | -8.95                            | -99.3                                        |                                  |                |               |               |               |               |
| -28                      | -8.66                            | -98.9                                        |                                  |                |               |               |               |               |
| -27                      | -8.36                            | -98.4                                        |                                  |                |               |               |               |               |
| -26                      | -8.06                            | -97.7                                        |                                  |                |               |               |               |               |
| -25                      | -7.75                            | -96.8                                        |                                  |                |               |               |               |               |
| -24                      | -7.44                            | -95.8                                        |                                  |                |               |               |               |               |
| -23                      | -7.13                            | -94.6                                        |                                  |                |               |               |               |               |
| -22                      | -6.82                            | -93.2                                        |                                  |                |               |               |               |               |
| -21                      | -6.51                            | -91.6                                        |                                  |                |               |               |               |               |
| -20                      | -6.20                            | -89.8                                        |                                  |                |               |               |               |               |

|                 |              |              |              |              |              |              |              |              |
|-----------------|--------------|--------------|--------------|--------------|--------------|--------------|--------------|--------------|
| -19             | -5.89        | -87.7        |              |              |              |              |              |              |
| -18             | -5.58        | -85.3        |              |              |              |              |              |              |
| -17             | -5.28        | -82.5        |              |              |              |              |              |              |
| -16             | -4.97        | -79.5        |              |              |              |              |              |              |
| <b>-15 [I]</b>  | <b>-4.66</b> | <b>-76.0</b> | <b>0.060</b> | <b>0.059</b> | <b>0.012</b> | <b>0.015</b> | <b>0.033</b> | <b>0.023</b> |
| -14             | -4.35        | -72.1        |              |              |              |              |              |              |
| -13             | -4.04        | -67.6        |              |              |              |              |              |              |
| -12             | -3.73        | -62.6        |              |              |              |              |              |              |
| -11             | -3.42        | -57.0        |              |              |              |              |              |              |
| -10             | -3.11        | -51.0        | 0.123        | 0.129        | 0.023        | 0.035        | 0.066        | 0.042        |
| -9              | -2.80        | -44.3        |              |              |              |              |              |              |
| -8              | -2.48        | -37.2        |              |              |              |              |              |              |
| -7              | -2.17        | -29.8        |              |              |              |              |              |              |
| <b>-6 [II]</b>  | <b>-1.86</b> | <b>-22.3</b> | <b>0.228</b> | <b>0.226</b> | <b>0.040</b> | <b>0.095</b> | <b>0.141</b> | <b>0.084</b> |
| -5              | -1.55        | -15.1        | 0.264        | 0.253        | 0.049        | 0.127        | 0.181        | 0.109        |
| <b>-4 [III]</b> | <b>-1.24</b> | <b>-8.66</b> | <b>0.301</b> | <b>0.276</b> | <b>0.076</b> | <b>0.171</b> | <b>0.240</b> | <b>0.159</b> |
| -3              | -0.93        | -3.37        | 0.338        | 0.297        | 0.543        | 0.754        | 0.507        | 0.228        |
| <b>-2 [IV]</b>  | <b>-0.62</b> | <b>0.36</b>  | <b>0.371</b> | <b>0.322</b> | <b>0.557</b> | <b>0.815</b> | <b>0.629</b> | <b>0.330</b> |
| -1              | -0.31        | 2.29         | 0.396        | 0.347        | 0.572        | 0.854        | 0.705        | 0.425        |
| <b>0 [TS]</b>   | <b>0.00</b>  | <b>2.82</b>  | <b>0.415</b> | <b>0.357</b> | <b>0.586</b> | <b>0.879</b> | <b>0.756</b> | <b>0.515</b> |
| 1               | 0.31         | 2.58         |              |              |              |              |              |              |
| 2               | 0.61         | 2.07         | 0.434        | 0.358        | 0.599        | 0.904        | 0.797        | 0.614        |
| 3               | 0.92         | 1.61         |              |              |              |              |              |              |
| 4               | 1.22         | 1.79         |              |              |              |              |              |              |
| 5               | 1.50         | 1.33         | 0.431        | 0.351        | 0.598        | 0.892        | 0.802        | 0.626        |
| 6               | 1.77         | 0.81         |              |              |              |              |              |              |
| 7               | 2.06         | 0.40         |              |              |              |              |              |              |
| 8               | 2.35         | 0.16         |              |              |              |              |              |              |
| <b>9 [V]</b>    | <b>2.65</b>  | <b>0.06</b>  | <b>0.441</b> | <b>0.350</b> | <b>0.606</b> | <b>0.907</b> | <b>0.818</b> | <b>0.672</b> |

<sup>a</sup> The step number is defined as 0 at the TS structure, negative toward the dissociated pair Bz<sup>+</sup> + O<sub>2</sub>, and positive toward the adduct BzOO<sup>+</sup>.

**Table S5.** Cartesian coordinates for geometries selected for IBO change calculations along the IRC pathway computed at the B3LYP/aug-cc-pVTZ level.

Step# -40

|   |             |             |             |
|---|-------------|-------------|-------------|
| C | -1.64282000 | -1.22656700 | 0.52080300  |
| C | -0.49521000 | -0.70080000 | 1.04989400  |
| C | -0.12065900 | 0.65289800  | 0.74605000  |
| C | -0.96051000 | 1.44074200  | -0.11154200 |
| C | -2.10633700 | 0.89499600  | -0.63641600 |
| C | -2.44183000 | -0.43081400 | -0.31619200 |
| H | -1.93932500 | -2.24140500 | 0.74317100  |
| H | 0.13864000  | -1.28718700 | 1.70260400  |
| H | -0.67303300 | 2.45907800  | -0.33683700 |
| H | -2.74765700 | 1.47451100  | -1.27860900 |
| H | -3.34732500 | -0.85475900 | -0.73342100 |
| C | 1.02478000  | 1.18453900  | 1.26402900  |
| H | 1.67007800  | 0.61138300  | 1.91827300  |
| H | 1.32276600  | 2.20252700  | 1.04532500  |
| O | 2.93911100  | -0.21084600 | -0.93190400 |
| O | 2.47076700  | -1.29979500 | -1.14900500 |

Step# -15; structure [I]

|   |             |             |             |
|---|-------------|-------------|-------------|
| C | -1.56066700 | -1.27164100 | 0.41719100  |
| C | -0.32382000 | -0.82075300 | 0.79586800  |
| C | 0.05977200  | 0.52506000  | 0.50485700  |
| C | -0.84185700 | 1.38135500  | -0.20000600 |
| C | -2.10005000 | 0.93478700  | -0.51305300 |
| C | -2.45401600 | -0.38529700 | -0.20928800 |
| H | -1.86545800 | -2.28803900 | 0.61994500  |
| H | 0.36624600  | -1.46900700 | 1.31821300  |
| H | -0.53259200 | 2.38958400  | -0.44121100 |
| H | -2.81010800 | 1.58400400  | -1.00452200 |
| H | -3.44390300 | -0.73714900 | -0.46948900 |
| C | 1.27251500  | 1.01552100  | 0.91980600  |
| H | 1.90537300  | 0.46179700  | 1.58741000  |
| H | 1.58259100  | 2.02332600  | 0.67456200  |
| O | 2.58676500  | -0.02074500 | -0.63859200 |
| O | 2.17805400  | -1.13764000 | -0.79231900 |

Step# -10

|   |             |             |             |
|---|-------------|-------------|-------------|
| C | -1.54946700 | -1.27383900 | 0.40360400  |
| C | -0.30319900 | -0.83379600 | 0.76462000  |
| C | 0.08870700  | 0.50170800  | 0.46758000  |
| C | -0.82127900 | 1.36687600  | -0.20425800 |
| C | -2.09532000 | 0.93708900  | -0.48908300 |
| C | -2.45319400 | -0.38280200 | -0.20420800 |
| H | -1.85284500 | -2.29114500 | 0.60375900  |
| H | 0.38746700  | -1.49596000 | 1.26924600  |
| H | -0.51031000 | 2.37388000  | -0.44758000 |
| H | -2.80822600 | 1.60360700  | -0.95166300 |
| H | -3.44610100 | -0.73103300 | -0.45760600 |
| C | 1.34299800  | 0.97078800  | 0.82012600  |
| H | 1.94825300  | 0.46093000  | 1.55896900  |
| H | 1.66972700  | 1.96214500  | 0.53220800  |
| O | 2.50191600  | 0.01828200  | -0.55263500 |
| O | 2.13313100  | -1.10171600 | -0.74930400 |

Step# -6; structure [II]

|   |             |             |             |
|---|-------------|-------------|-------------|
| C | -1.54125600 | -1.27029300 | 0.39634100  |
| C | -0.28558800 | -0.83786600 | 0.74426100  |
| C | 0.10801400  | 0.48530300  | 0.44864700  |
| C | -0.81454200 | 1.35375600  | -0.19917100 |
| C | -2.10078000 | 0.93474300  | -0.47767500 |
| C | -2.46085500 | -0.38112400 | -0.20814200 |
| H | -1.84211500 | -2.28807200 | 0.60004400  |
| H | 0.39901000  | -1.51262400 | 1.23936900  |
| H | -0.50413800 | 2.35917300  | -0.45184900 |
| H | -2.80641300 | 1.61271500  | -0.93447800 |
| H | -3.44876400 | -0.73719500 | -0.46782900 |
| C | 1.42155300  | 0.92410700  | 0.73317700  |
| H | 1.96718600  | 0.48476300  | 1.56075100  |
| H | 1.72630700  | 1.92647400  | 0.45892300  |
| O | 2.44552800  | 0.05413700  | -0.48457000 |
| O | 2.09501900  | -1.07716100 | -0.72018000 |



Step# -5

|   |             |             |             |
|---|-------------|-------------|-------------|
| C | -1.54008600 | -1.26880200 | 0.39298600  |
| C | -0.28057600 | -0.83810000 | 0.73965500  |
| C | 0.11220700  | 0.48223200  | 0.44501900  |
| C | -0.81282300 | 1.34974300  | -0.19637400 |
| C | -2.10360900 | 0.93319500  | -0.47543800 |
| C | -2.46468900 | -0.38201800 | -0.20953800 |
| H | -1.83969900 | -2.28581200 | 0.60128400  |
| H | 0.40069100  | -1.51477000 | 1.23688300  |
| H | -0.50320500 | 2.35336700  | -0.45659400 |
| H | -2.80616500 | 1.61401700  | -0.93398500 |
| H | -3.45124800 | -0.73879100 | -0.47119100 |
| C | 1.44457800  | 0.91246100  | 0.71141700  |
| H | 1.96924300  | 0.49167200  | 1.56333300  |
| H | 1.73442200  | 1.92204900  | 0.45041700  |
| O | 2.43616700  | 0.06523600  | -0.46831700 |
| O | 2.08221400  | -1.07309900 | -0.71321100 |

Step# -4; structure [III]

|   |             |             |             |
|---|-------------|-------------|-------------|
| C | -1.53834800 | -1.26770800 | 0.38911900  |
| C | -0.27392500 | -0.83488000 | 0.73437700  |
| C | 0.11703400  | 0.47624300  | 0.44362000  |
| C | -0.81131900 | 1.34530800  | -0.19329100 |
| C | -2.10826000 | 0.92787200  | -0.47262000 |
| C | -2.47053400 | -0.37934300 | -0.21298000 |
| H | -1.83687600 | -2.28514100 | 0.59875100  |
| H | 0.40154900  | -1.51226600 | 1.23788800  |
| H | -0.50124100 | 2.34723000  | -0.46010700 |
| H | -2.80766200 | 1.61287200  | -0.92928800 |
| H | -3.45617900 | -0.73889300 | -0.47439000 |
| C | 1.46717700  | 0.90195000  | 0.69080200  |
| H | 1.97362000  | 0.50832800  | 1.56722100  |
| H | 1.74537500  | 1.91721300  | 0.43694700  |
| O | 2.42855500  | 0.07441400  | -0.45289800 |
| O | 2.06878500  | -1.06830100 | -0.70627200 |

Step# -3

|   |             |             |             |
|---|-------------|-------------|-------------|
| C | -1.54144300 | -1.26704800 | 0.38290400  |
| C | -0.26714400 | -0.83090100 | 0.72906000  |
| C | 0.12094900  | 0.47399900  | 0.44015300  |
| C | -0.80542100 | 1.34145300  | -0.18826000 |
| C | -2.11247600 | 0.92110000  | -0.46990700 |
| C | -2.47571500 | -0.38089200 | -0.21478400 |
| H | -1.83600600 | -2.28535500 | 0.59494100  |
| H | 0.40153900  | -1.50770500 | 1.24229300  |
| H | -0.49860400 | 2.34313200  | -0.46048700 |
| H | -2.80903600 | 1.61074200  | -0.92454300 |
| H | -3.46179600 | -0.73956000 | -0.47405500 |
| C | 1.48981900  | 0.89300100  | 0.67123300  |
| H | 1.97568600  | 0.52454000  | 1.57077000  |
| H | 1.75382100  | 1.91437700  | 0.42685100  |
| O | 2.42406900  | 0.08486300  | -0.43810400 |
| O | 2.05276600  | -1.06538000 | -0.69950900 |

Step# -2; structure [IV]

|   |             |             |             |
|---|-------------|-------------|-------------|
| C | -1.54681400 | -1.26751200 | 0.37539400  |
| C | -0.26040900 | -0.82582500 | 0.72298800  |
| C | 0.12533400  | 0.47357900  | 0.43541000  |
| C | -0.79723800 | 1.33830400  | -0.18256600 |
| C | -2.11584900 | 0.91275300  | -0.46664700 |
| C | -2.48040700 | -0.38395000 | -0.21588000 |
| H | -1.83493900 | -2.28837200 | 0.58608500  |
| H | 0.39937400  | -1.49941200 | 1.25138800  |
| H | -0.49639900 | 2.34246900  | -0.45321900 |
| H | -2.81016000 | 1.60715700  | -0.91713900 |
| H | -3.46796700 | -0.74098100 | -0.47074500 |
| C | 1.51040600  | 0.88622300  | 0.65344800  |
| H | 1.97780800  | 0.54766100  | 1.57445100  |
| H | 1.76372600  | 1.91154800  | 0.41164600  |
| O | 2.42135300  | 0.09344900  | -0.42396800 |
| O | 2.03526600  | -1.06236000 | -0.69287000 |

Step# -1

|   |             |             |             |
|---|-------------|-------------|-------------|
| C | -1.55289200 | -1.27021600 | 0.36757300  |
| C | -0.25717800 | -0.82338700 | 0.71600100  |
| C | 0.12983300  | 0.47702400  | 0.42691200  |
| C | -0.78857500 | 1.33764400  | -0.17694300 |
| C | -2.11442800 | 0.90652300  | -0.46286900 |
| C | -2.48265400 | -0.39176500 | -0.21428000 |
| H | -1.83421300 | -2.29299300 | 0.57850700  |
| H | 0.39459400  | -1.49094300 | 1.26148400  |
| H | -0.49532600 | 2.34485500  | -0.44409800 |
| H | -2.80788600 | 1.60303600  | -0.91191000 |
| H | -3.47280600 | -0.74383500 | -0.46486200 |
| C | 1.52912700  | 0.88157800  | 0.63731300  |
| H | 1.97681200  | 0.56776400  | 1.57685400  |
| H | 1.77312600  | 1.91053500  | 0.39893300  |
| O | 2.42058600  | 0.10081500  | -0.41030700 |
| O | 2.01468900  | -1.05874900 | -0.68597900 |

Step# 0; structure [TS]

|   |             |             |             |
|---|-------------|-------------|-------------|
| C | -1.55745200 | -1.27593400 | 0.36076010  |
| C | -0.25726400 | -0.82415700 | 0.70861640  |
| C | 0.13360600  | 0.48213000  | 0.41550100  |
| C | -0.78107200 | 1.34032200  | -0.17231100 |
| C | -2.10834800 | 0.90326100  | -0.45906320 |
| C | -2.48139500 | -0.40218000 | -0.21065290 |
| H | -1.83376100 | -2.29933000 | 0.57407120  |
| H | 0.38926000  | -1.48348100 | 1.27029370  |
| H | -0.49464200 | 2.34996000  | -0.43623190 |
| H | -2.80318900 | 1.59854400  | -0.90892190 |
| H | -3.47519200 | -0.74641400 | -0.45706310 |
| C | 1.54541500  | 0.87852900  | 0.62265670  |
| H | 1.97257900  | 0.58401500  | 1.57856160  |
| H | 1.78111300  | 1.91098500  | 0.38913470  |
| O | 2.42130000  | 0.10683400  | -0.39703520 |
| O | 1.99115800  | -1.05419600 | -0.67903540 |

## Step# 2

|   |             |             |             |
|---|-------------|-------------|-------------|
| C | -1.55568800 | -1.28965700 | 0.34666400  |
| C | -0.25527200 | -0.82686400 | 0.69396200  |
| C | 0.14053200  | 0.49151100  | 0.39550300  |
| C | -0.77300100 | 1.34889600  | -0.16487800 |
| C | -2.09584700 | 0.90012500  | -0.45056500 |
| C | -2.47410400 | -0.41925000 | -0.20450000 |
| H | -1.82304200 | -2.31567300 | 0.55796400  |
| H | 0.38391300  | -1.46900200 | 1.28431500  |
| H | -0.49887600 | 2.36504000  | -0.41530500 |
| H | -2.79648700 | 1.59078300  | -0.89924800 |
| H | -3.47467600 | -0.75164000 | -0.44019700 |
| C | 1.56562000  | 0.88373100  | 0.59977300  |
| H | 1.96470000  | 0.63223100  | 1.58214800  |
| H | 1.79126900  | 1.91623700  | 0.35272700  |
| O | 2.42570300  | 0.10564700  | -0.37121100 |
| O | 1.94200900  | -1.04627500 | -0.66847900 |

## Step# 5

|   |             |             |             |
|---|-------------|-------------|-------------|
| C | -1.53192000 | -1.29848300 | 0.33690700  |
| C | -0.24324500 | -0.82674700 | 0.68329400  |
| C | 0.14289400  | 0.49945900  | 0.39098000  |
| C | -0.78095900 | 1.35978400  | -0.16257100 |
| C | -2.09189500 | 0.90259500  | -0.44361700 |
| C | -2.45914500 | -0.42429600 | -0.20472900 |
| H | -1.78837100 | -2.32985800 | 0.53681400  |
| H | 0.40737100  | -1.46283600 | 1.26619700  |
| H | -0.51351000 | 2.37959700  | -0.40701900 |
| H | -2.80373700 | 1.58616700  | -0.88421300 |
| H | -3.45772800 | -0.76370900 | -0.43712600 |
| C | 1.56189200  | 0.90217200  | 0.59291500  |
| H | 1.95836000  | 0.69384000  | 1.58583700  |
| H | 1.79270400  | 1.92285900  | 0.29646500  |
| O | 2.42786800  | 0.07991200  | -0.34929000 |
| O | 1.90275300  | -1.04370100 | -0.66918500 |

## Step# 9; structure [V]

|   |             |             |             |
|---|-------------|-------------|-------------|
| C | -1.48777400 | -1.31259000 | 0.30483600  |
| C | -0.21113900 | -0.81389300 | 0.66240000  |
| C | 0.14797200  | 0.53355200  | 0.37848000  |
| C | -0.79113700 | 1.38312200  | -0.14034100 |
| C | -2.08846800 | 0.89737100  | -0.42440800 |
| C | -2.42472700 | -0.45362000 | -0.21337500 |
| H | -1.72639200 | -2.34846700 | 0.49683600  |
| H | 0.43469600  | -1.42939900 | 1.27404000  |
| H | -0.54513900 | 2.40887900  | -0.37688700 |
| H | -2.81847000 | 1.56793100  | -0.85723800 |
| H | -3.41987100 | -0.80052300 | -0.45168200 |
| C | 1.57876300  | 0.93227600  | 0.55399000  |
| H | 1.95704200  | 0.81314400  | 1.57212700  |
| H | 1.81067700  | 1.92914400  | 0.18627900  |
| O | 2.42539400  | 0.02934200  | -0.28684900 |
| O | 1.80465600  | -1.03916800 | -0.67076100 |

## References

- 1 K. A. Peterson, T. B. Adler and H.-J. Werner, *J. Chem. Phys.*, 2008, **128**, 084102.
- 2 T. H. Dunning, *J. Chem. Phys.*, 1989, **90**, 1007-1023.
- 3 R. A. Kendall, T. H. Dunning and R. J. Harrison, *J. Chem. Phys.*, 1992, **96**, 6796-6806.
- 4 G. Knizia, T. B. Adler and H.-J. Werner, *J. Chem. Phys.*, 2009, **130**, 054104.
- 5 T. B. Adler, G. Knizia and H.-J. Werner, *J. Chem. Phys.*, 2007, **127**, 221106.
- 6 G. Knizia and H.-J. Werner, *J. Chem. Phys.*, 2008, **128**, 154103.
- 7 K. A. Peterson, T. B. Adler and H.-J. Werner, *J. Chem. Phys.*, 2008, **128**, 084102.
- 8 K. A. Peterson and T. H. Dunning, *J. Chem. Phys.*, 2002, **117**, 10548-10560.
- 9 H. Werner, P. Knowles, G. Knizia, F. Manby, M. Schütz, P. Celani, W. Györffy, D. Kats, T. Korona and R. Lindh, *molpro, version 2022, a package of ab initio programs*, **for more information, see <https://www.molpro.net>**.
